# Supplementary material
Source: PubMed Central journal article supplement (PMC3149351)
Supplement: supp_M110.217141_jbc.M110.217141-1.pdf [file supp_M110.217141_jbc.M110.217141-1.pdf]

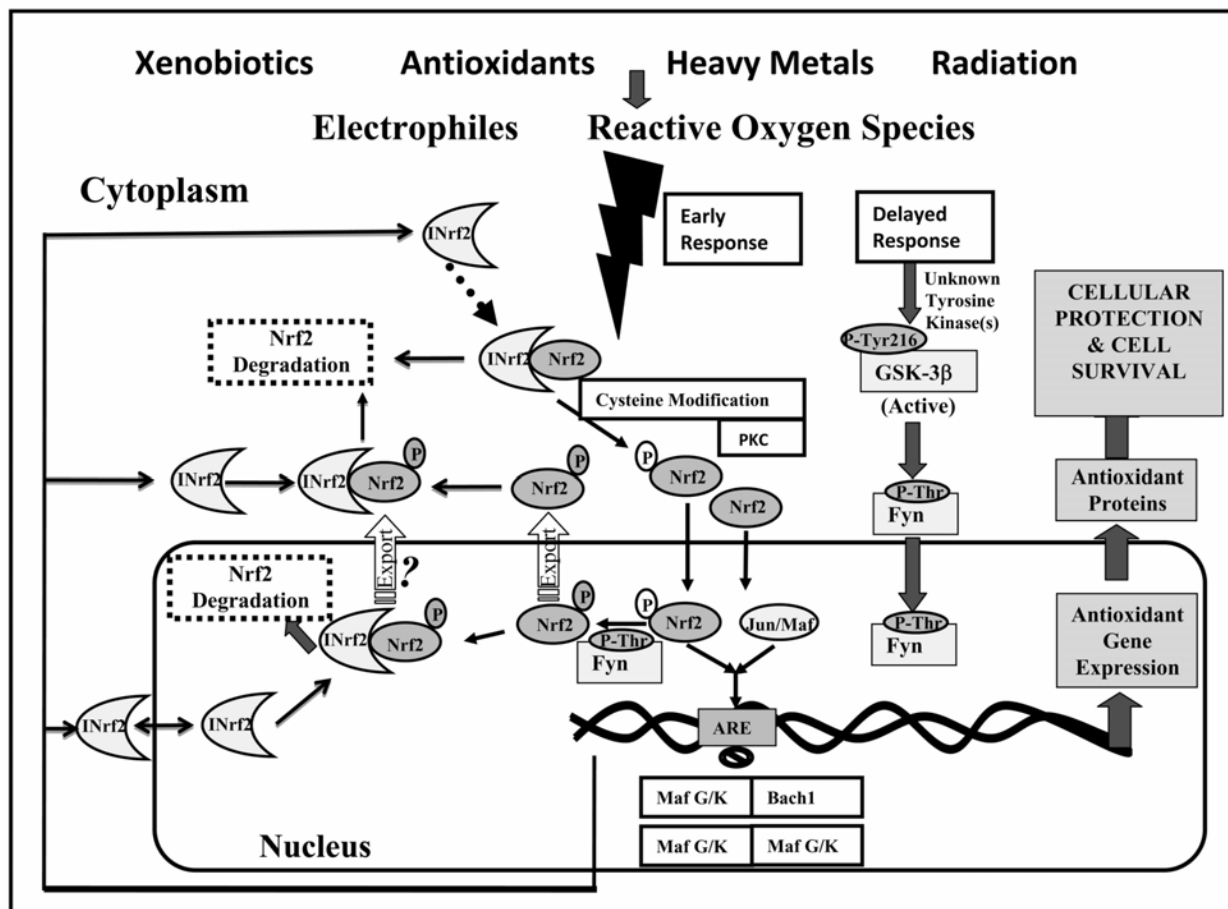

Supplemental Fig. 1. *Free Radic Biol Med.* 2009 47(9): 1304–1309.

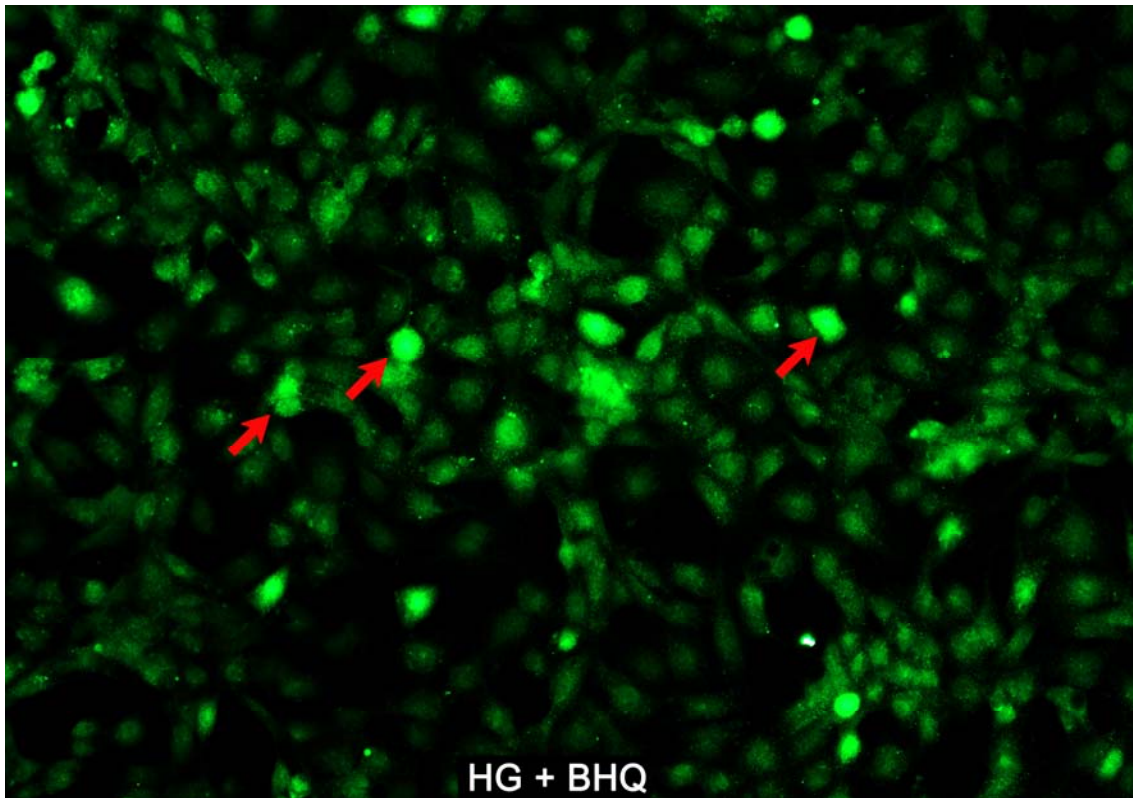

*Supplemental Fig.2. Nrf2 Localization after high glucose + BHQ*
